# Supplementary material
Source: publisher figshare collection journal article supplement (https://acs.figshare.com/ndownloader/files/4519894)
Supplement: Supplementary file 1 [file 4519894]

# Shape Memory Polymers Based on Naturally-Occurring Bile Acids

## Supporting Information

*Julien E. Gautrot and X. X. Zhu\**

Département de chimie, Université de Montréal,  
C.P. 6128, succursale Centre-ville, Montréal, Québec, H3C 3J7, Canada

\*corresponding author: [julian.zhu@umontreal.ca](mailto:julian.zhu@umontreal.ca)

**Supplementary Table S1.** Shape memory performance of bile acid-based polymers.

|                       | E (MPa) <sup>c</sup>  |                       | Shape Memory - warm drawing (%) |                    |                    |                    |                    |                    | Shape Memory - cold drawing (%) |                    |                    |                    |                    |                    |
|-----------------------|-----------------------|-----------------------|---------------------------------|--------------------|--------------------|--------------------|--------------------|--------------------|---------------------------------|--------------------|--------------------|--------------------|--------------------|--------------------|
|                       | at T <sub>g</sub> -10 | at T <sub>g</sub> +10 | R <sub>f</sub> (1) <sup>a</sup> | R <sub>f</sub> (2) | R <sub>f</sub> (3) | R <sub>f</sub> (1) | R <sub>f</sub> (2) | R <sub>f</sub> (3) | R <sub>f</sub> (1)              | R <sub>f</sub> (2) | R <sub>f</sub> (3) | R <sub>f</sub> (1) | R <sub>f</sub> (2) | R <sub>f</sub> (3) |
| <b>1a</b>             | 76 ± 16               | 3.3 ± 0.2             | 97.8 ± 0.6                      | 99.1 ± 0.5         | 99.8 ± 0.4         | 97.9 ± 0.1         | 97.9 ± 0.2         | 97.9 ± 0.2         | 95.8 ± 0.6                      | 99.5 ± 0.5         | 99.6 ± 0.2         | 79.7 ± 1.1         | 78.9 ± 1.2         | 78.6 ± 0.9         |
| <b>1b</b>             | 177 ± 35              | 3.5 ± 0.7             | 98.8 ± 0.2                      | 99.7 ± 0.4         | 99.9 ± 0.03        | 98.4 ± 0.1         | 98.2 ± 0.1         | 98.3 ± 0.3         | 95.7 ± 0.9                      | 99.2 ± 0.2         | 99.5 ± 0.2         | 80.4 ± 2.7         | 79.9 ± 2.3         | 79.5 ± 2.2         |
| <b>1c</b>             | 197 ± 92              | 3.6 ± 0.6             | 97.4 ± 1.0                      | 98.9 ± 0.7         | 99.5 ± 0.2         | 98.1 ± 0.2         | 98.1 ± 0.2         | 98.0 ± 0.2         | 95.2 ± 0.7                      | 97.6 ± 1.3         | 98.7 ± 0.3         | 74.3 ± 3.2         | 72.9 ± 2.7         | 71.4 ± 1.9         |
| <b>1d</b>             | 266 ± 42              | 65 ± 13               | 95.3 ± 2.4                      | 96.2 ± 2.3         | 95.9 ± 1.8         | 95.7 ± 0.7         | 95.6 ± 0.5         | 95.9 ± 1.4         | 93.9 ± 1.3                      | 98.6 ± 0.9         | 99.7 ± 0.4         | 75.3 ± 3.5         | 76.5 ± 2.8         | 77.8 ± 2.4         |
| <b>1e</b>             | 175 ± 24              | 5.9 ± 0.9             | 95.4 ± 1.9                      | 98.7 ± 0.7         | 99.5 ± 0.2         | 94.6 ± 2.0         | 94.2 ± 1.8         | 93.6 ± 2.0         | 95.3 ± 1.1                      | 99.0 ± 0.6         | 99.6 ± 0.2         | 59.2 ± 2.4         | 56.1 ± 3.8         | 56.1 ± 3.0         |
| <b>4a</b>             | 71 ± 19               | 4.3 ± 0.6             | 97.1 ± 1.4                      | 99.5 ± 0.2         | 99.4 ± 0.4         | 94.9 ± 1.1         | 94.4 ± 1.6         | 94.7 ± 1.2         | 93.5 ± 1.1                      | 96.3 ± 0.9         | 98.7 ± 0.3         | 71.6 ± 4.3         | 68.0 ± 2.5         | 67.3 ± 2.3         |
| <b>4b<sup>b</sup></b> | 148 ± 14              | 4.6 ± 0.6             | 89.7 ± 1.4                      | 94.6 ± 0.4         | 97.1 ± 0.3         | 92.1 ± 1.6         | 90.7 ± 1.8         | 90.1 ± 2.0         | 95.3 ± 1.3                      | 95.8 ± 1.3         | 98.3 ± 0.9         | 60.9 ± 1.2         | 60.7 ± 1.1         | 59.0 ± 1.1         |
| <b>4c</b>             | 252 ± 19              | 19.6 ± 4.2            | 96.5 ± 3.5                      | 99.0 ± 0.7         | 99.6 ± 0.1         | 91.8 ± 3.5         | 91.4 ± 2.0         | 90.7 ± 2.4         | 94.7 ± 0.8                      | 98.2 ± 0.9         | 99.3 ± 0.5         | 64.4 ± 2.0         | 65.5 ± 3.9         | 65.6 ± 2.9         |

<sup>a</sup> the numbers in brackets describe the number of the shape memory cycle; <sup>b</sup> Young's moduli were measured at 37.5 °C, T<sub>g</sub>-20 and T<sub>g</sub>+20.
